# Supplementary material
Source: publisher figshare collection journal article supplement (https://springernature.figshare.com/ndownloader/files/15286400)
Supplement: Supplementary file [file 15286400]

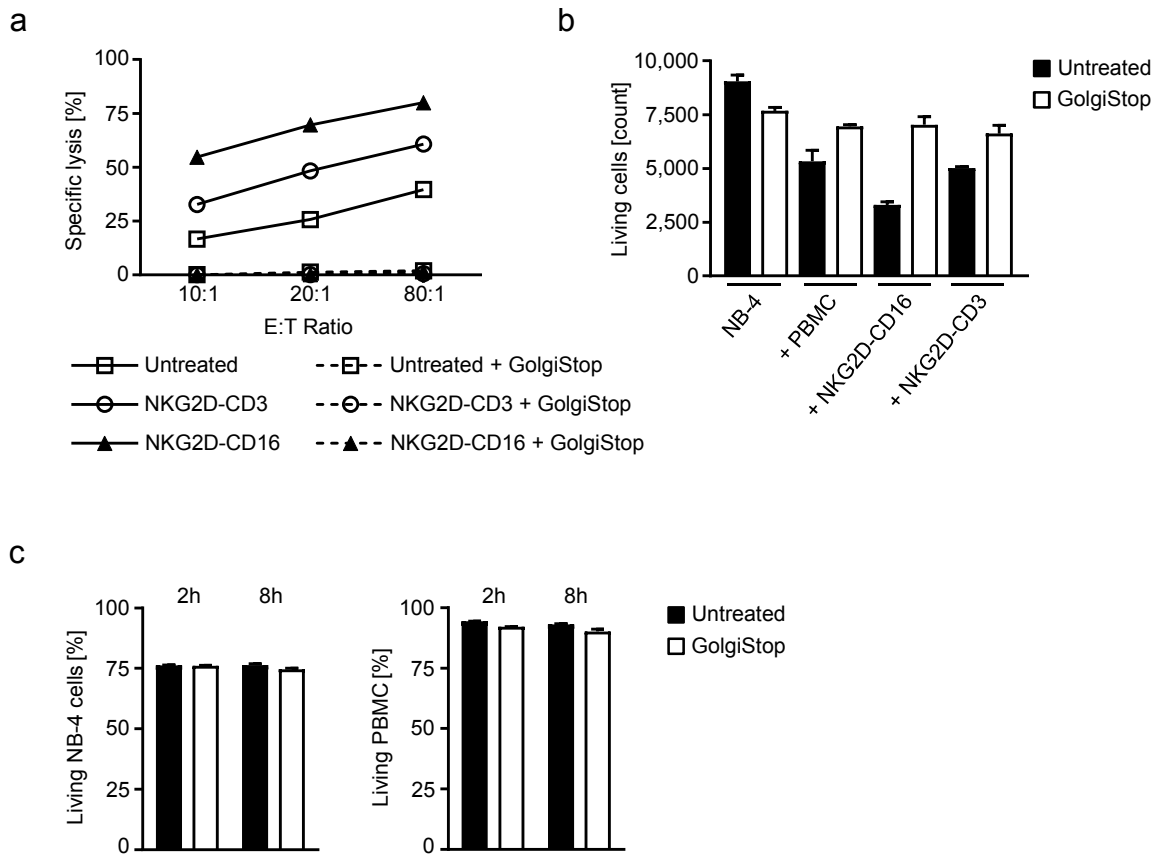

**Supplementary Figure 4: Influence of blocking granule exocytosis on BFP-induced effector cell functionality**

(a-b) PBMC of healthy donors were pretreated for 30min with monensin (GolgiStop, BD Biosciences) according to manufacturer's instructions. Then NB-4 leukemia cells and the indicated constructs (all 10µg/mL) were added.

(a) Lysis of leukemia cells was determined by 2h cytotoxicity assays. Exemplary results of three independent experiments with similar results are shown.

(b) Lysis of leukemia cells at an E:T ratio of 20:1 was determined by flow cytometry based lysis assays after 8h. Exemplary results of three independent experiments with similar results are shown.

(c) Leukemia cells (left) or PBMC (right) were cultured for 2h or 8h with monensin according to manufacturer's instructions. Then the percentage of living cells was analyzed by flow cytometry using PI. Exemplary results of three independent experiments with similar results are shown.
